# Supplementary material for: Coughing children in family practice and primary care: a systematic review of prevalence, aetiology and prognosis
Source: PubMed Central journal article supplement (PMC8176681; doi:10.1186/s12887-021-02739-4), 2021-06-04
Supplement: 12887_2021_2739_MOESM3_ESM.pdf [file 12887_2021_2739_MOESM3_ESM.pdf]

# Coughing Children in Family Practice and Primary care: A systematic review of prevalence, aetiology and prognosis

Authors: Milena Bergmann,<sup>a</sup> Jörg Haasenritter,<sup>a</sup> Dominik Beidatsch,<sup>a</sup> Sonja Schwarm,<sup>a</sup> Kaja Hörner,<sup>a</sup> Stefan Bösner,<sup>a</sup> Paula Grevenrath,<sup>a</sup> Laura Schmidt,<sup>a</sup> Annika Viniol,<sup>a</sup> Norbert Donner-Banzhoff,<sup>a</sup> and Annette Becker,<sup>a\*</sup>

<sup>a</sup> Department of General Practice/Family Medicine, University of Marburg, Marburg, Germany

\* Corresponding author:  
Annette Becker  
Department of General Practice/Family Medicine, University of Marburg  
Karl-von-Frisch-Str. 4, 35043 Marburg, Germany  
E-mail: [Annette.Becker@staff.uni-marburg.de](mailto:Annette.Becker@staff.uni-marburg.de)

## Additional File 3

Title: Tool for assessing method quality, risk of bias and clinical heterogeneity

Legend: For each domain, reviewers independently answered the standardized key questions (yes, no or unclear) and assessed the risk of bias for the respective domain (low, high or unclear). In Domain A reviewers also rated their concern that the selection of patients and/or of GPs may have introduced substantial variation/ clinical heterogeneity (low, high or unclear).

Domain A and B referred to all studies regardless of the respective study outcome. Domain C was only considered if the respective study reported data on the underlying aetiologies of cough patients. Domain D was only considered if the respective study presented prognostic outcomes. In Domain C and D, key questions had to be answered separately for each diagnostic or prognostic category respectively.

|                                                                                                                                                                                                                                                                              |                                                                                                                                                                                                         |
|------------------------------------------------------------------------------------------------------------------------------------------------------------------------------------------------------------------------------------------------------------------------------|---------------------------------------------------------------------------------------------------------------------------------------------------------------------------------------------------------|
| <b>Domain A: Selection of patients and GPs (refers to all studies regardless the review question)</b>                                                                                                                                                                        |                                                                                                                                                                                                         |
| Item 1                                                                                                                                                                                                                                                                       | Was the symptom to be investigated clearly described?                                                                                                                                                   |
| Item 2                                                                                                                                                                                                                                                                       | Were the selection criteria of the patients clearly described?                                                                                                                                          |
| Item 3                                                                                                                                                                                                                                                                       | Was a consecutive or random sample of patients enrolled?                                                                                                                                                |
| Item 4                                                                                                                                                                                                                                                                       | Was it a multi-centre study?                                                                                                                                                                            |
| <i>Judgement: Risk that the selection of patients introduced bias: low, unclear, high</i>                                                                                                                                                                                    |                                                                                                                                                                                                         |
| Item 5                                                                                                                                                                                                                                                                       | Did the selection criteria of the patients permit the study population to represent the full spectrum of those presenting with the symptom in the respective setting/ addressed in the review question? |
| Item 6                                                                                                                                                                                                                                                                       | Were the participating health care professionals/ institutions representative for setting to be investigated in the review.                                                                             |
| <i>Judgement: Concern that the selection of patients and GPs introduced substantial variation or clinical heterogeneity: low, unclear, high</i>                                                                                                                              |                                                                                                                                                                                                         |
| <b>Domain B: Data collection and patient flow (refers to all studies regardless of the review question)</b>                                                                                                                                                                  |                                                                                                                                                                                                         |
| Item 7                                                                                                                                                                                                                                                                       | Were data about the symptom und the inclusion criteria collected directly from the patients (as opposed to a proxy like a register, routine documentation)                                              |
| Item 8                                                                                                                                                                                                                                                                       | Was the same mode of data collection used for all patients?                                                                                                                                             |
| Item 9                                                                                                                                                                                                                                                                       | Was the number of non-responders/ dropouts unlikely to affect the results?                                                                                                                              |
| <i>Judgement: Risk that the mode of data collection and/ or patient flow introduced bias: low, unclear, high</i>                                                                                                                                                             |                                                                                                                                                                                                         |
| <b>Domain C: Determination of the underlying aetiology/ diagnostic work-up (refers only to review question “What are the underlying conditions and their respective frequencies (differential diagnosis)?”). Had to be answered for each diagnostic category separately.</b> |                                                                                                                                                                                                         |
| Item 10                                                                                                                                                                                                                                                                      | Was the aetiologic category clearly defined?                                                                                                                                                            |
| Item 11                                                                                                                                                                                                                                                                      | Was the diagnostic work up likely to correctly classify the respective aetiology?                                                                                                                       |
| Item 12                                                                                                                                                                                                                                                                      | Did every patient receive the same diagnostic work up to detect the respective aetiology?                                                                                                               |
| <i>Judgement: Risk that the diagnostic work up introduce bias: low, unclear, high</i>                                                                                                                                                                                        |                                                                                                                                                                                                         |
| <b>Domain D: Determination of the prognosis/ prognostic work-up (refers only to review question “What is the prognosis of patients with the respective symptom presenting in the respective setting?”) Had to be answered for each prognostic category separately.</b>       |                                                                                                                                                                                                         |
| Item 13                                                                                                                                                                                                                                                                      | Was the prognostic outcome clearly defined?                                                                                                                                                             |
| Item 14                                                                                                                                                                                                                                                                      | Did the study design include a comparison group without the symptom?                                                                                                                                    |
| Item 15                                                                                                                                                                                                                                                                      | Was the work up/ measurement likely to correctly classify the respective prognostic outcome?                                                                                                            |
| Item 16                                                                                                                                                                                                                                                                      | Did every patient receive the same work up/ mode of data collection to verify the respective prognostic outcome?                                                                                        |
| <i>Judgement: Risk that the prognostic work up introduce bias: low, unclear, high</i>                                                                                                                                                                                        |                                                                                                                                                                                                         |
