# Supplementary material for: Coughing children in family practice and primary care: a systematic review of prevalence, aetiology and prognosis
Source: PubMed Central journal article supplement (PMC8176681; doi:10.1186/s12887-021-02739-4), 2021-06-04
Supplement: 12887_2021_2739_MOESM4_ESM.pdf [file 12887_2021_2739_MOESM4_ESM.pdf]

# Coughing Children in Family Practice and Primary Care: A systematic review of prevalence, aetiology and prognosis

Authors: Milena Bergmann,<sup>a</sup> Jörg Haasenritter,<sup>a</sup> Dominik Beidatsch,<sup>a</sup> Sonja Schwarm,<sup>a</sup> Kaja Hörner,<sup>a</sup> Stefan Bösner,<sup>a</sup> Paula Grevenrath,<sup>a</sup> Laura Schmidt,<sup>a</sup> Annika Viniol,<sup>a</sup> Norbert Donner-Banzhoff<sup>a</sup> and Annette Becker<sup>a\*</sup>

<sup>a</sup> Department of General Practice/Family Medicine, University of Marburg, Marburg, Germany

\* Corresponding author:  
Annette Becker  
Department of General Practice/Family Medicine, University of Marburg  
Karl-von-Frisch-Str. 4, 35043 Marburg, Germany  
E-mail: [Annette.Becker@staff.uni-marburg.de](mailto:Annette.Becker@staff.uni-marburg.de)

Additional File 4:

Title: Quality, risk of bias and clinical heterogeneity of included studies

| Domain                   | A: Selection of patients and GPs (assessed for all included studies) |                                                                |                                                          |                              |                                                     |                                                                                                                                                                                                         |                                                                                                                             | B: Data collection and patient flow (assessed for all included studies)                                   |                                                                                                                                                             |                                                             |                                                                            |                                                                            | C: Determination of the underlying aetiology of the symptom (assessed for 4 studies including aetiological outcomes) |                                                                                   |                                                                                           | D: Determination of the prognosis (assessed for 1 study including prognostic outcomes) |                                             |                                                                      |                                                                                              |                                                                                                                  |                                                 |
|--------------------------|----------------------------------------------------------------------|----------------------------------------------------------------|----------------------------------------------------------|------------------------------|-----------------------------------------------------|---------------------------------------------------------------------------------------------------------------------------------------------------------------------------------------------------------|-----------------------------------------------------------------------------------------------------------------------------|-----------------------------------------------------------------------------------------------------------|-------------------------------------------------------------------------------------------------------------------------------------------------------------|-------------------------------------------------------------|----------------------------------------------------------------------------|----------------------------------------------------------------------------|----------------------------------------------------------------------------------------------------------------------|-----------------------------------------------------------------------------------|-------------------------------------------------------------------------------------------|----------------------------------------------------------------------------------------|---------------------------------------------|----------------------------------------------------------------------|----------------------------------------------------------------------------------------------|------------------------------------------------------------------------------------------------------------------|-------------------------------------------------|
| Item                     | 1                                                                    | 2                                                              | 3                                                        | 4                            | 5                                                   | 6                                                                                                                                                                                                       |                                                                                                                             | 7                                                                                                         | 8                                                                                                                                                           | 9                                                           |                                                                            | 10                                                                         | 11                                                                                                                   | 12                                                                                |                                                                                           | 13                                                                                     | 14                                          | 15                                                                   | 16                                                                                           |                                                                                                                  |                                                 |
| Studies                  | Was the symptom to be investigated clearly described?                | Were the selection criteria of the patients clearly described? | Was a consecutive or random sample of patients enrolled? | Was it a multi-centre study? | Risk that the selection of patients introduced bias | Did the selection criteria of the patients permit the study population to represent the full spectrum of those presenting with the symptom in the respective setting/ addressed in the review question? | Were the participating health care professionals/ institutions representative for setting to be investigated in the review? | Concern that the selection of patients and GPs introduced substantial variation or clinical heterogeneity | Were data about the symptom and the inclusion criteria collected directly from the patients (as opposed to a proxy like a register, routine documentation)? | Was the same mode of data collection used for all patients? | Was the number of non-responders/ dropouts unlikely to affect the results? | Risk that the mode of data collection and/ or patient flow introduced bias | Was the aetiological category clearly defined?                                                                       | Was the diagnostic work up likely to correctly classify the respective aetiology? | Did every patient receive the same diagnostic work up to detect the respective aetiology? | Risk that the diagnostic work up introduce bias                                        | Was the prognostic outcome clearly defined? | Did the study design include a comparison group without the symptom? | Was the work up/ measurement likely to correctly classify the respective prognostic outcome? | Did every patient receive the same work up/ mode of data collection to verify the respective prognostic outcome? | Risk that the prognostic work up introduce bias |
| Boyce 2019               | -                                                                    | -                                                              | ?                                                        | +                            | ?                                                   | -                                                                                                                                                                                                       | -                                                                                                                           | high                                                                                                      | +                                                                                                                                                           | +                                                           | +                                                                          | low                                                                        |                                                                                                                      |                                                                                   |                                                                                           |                                                                                        |                                             |                                                                      |                                                                                              |                                                                                                                  |                                                 |
| Cazzato 2001             | -                                                                    | ?                                                              | +                                                        | +                            | low                                                 | -                                                                                                                                                                                                       | +                                                                                                                           | high                                                                                                      | +                                                                                                                                                           | +                                                           | +                                                                          | low                                                                        |                                                                                                                      |                                                                                   |                                                                                           |                                                                                        |                                             |                                                                      |                                                                                              |                                                                                                                  |                                                 |
| Giannattasio 2014        | -                                                                    | ?                                                              | +                                                        | -                            | ?                                                   | +                                                                                                                                                                                                       | +                                                                                                                           | low                                                                                                       | +                                                                                                                                                           | +                                                           | +                                                                          | low                                                                        |                                                                                                                      |                                                                                   |                                                                                           |                                                                                        |                                             |                                                                      |                                                                                              |                                                                                                                  |                                                 |
| Hall 2017                | -                                                                    | +                                                              | ?                                                        | -                            | high                                                | -                                                                                                                                                                                                       | +                                                                                                                           | high                                                                                                      | +                                                                                                                                                           | +                                                           | +                                                                          | low                                                                        |                                                                                                                      |                                                                                   |                                                                                           |                                                                                        |                                             |                                                                      |                                                                                              |                                                                                                                  |                                                 |
| Hamden 2006              | +                                                                    | -                                                              | ?                                                        | ?                            | ?                                                   | -                                                                                                                                                                                                       | +                                                                                                                           | high                                                                                                      | +                                                                                                                                                           | +                                                           | ?                                                                          | ?                                                                          | +                                                                                                                    | +                                                                                 | +                                                                                         | low                                                                                    | +                                           | -                                                                    | +                                                                                            | +                                                                                                                | low                                             |
| Krishnan 2019            | -                                                                    | +                                                              | ?                                                        | -                            | high                                                | +                                                                                                                                                                                                       | +                                                                                                                           | low                                                                                                       | -                                                                                                                                                           | ?                                                           | ?                                                                          | ?                                                                          | -                                                                                                                    | ?                                                                                 | ?                                                                                         | ?                                                                                      |                                             |                                                                      |                                                                                              |                                                                                                                  |                                                 |
| Leconte 2011             | +                                                                    | -                                                              | +                                                        | +                            | low                                                 | ?                                                                                                                                                                                                       | +                                                                                                                           | ?                                                                                                         | +                                                                                                                                                           | +                                                           | +                                                                          | low                                                                        |                                                                                                                      |                                                                                   |                                                                                           |                                                                                        |                                             |                                                                      |                                                                                              |                                                                                                                  |                                                 |
| Mash 2012                | -                                                                    | ?                                                              | +                                                        | +                            | low                                                 | +                                                                                                                                                                                                       | -                                                                                                                           | high                                                                                                      | +                                                                                                                                                           | +                                                           | +                                                                          | low                                                                        |                                                                                                                      |                                                                                   |                                                                                           |                                                                                        |                                             |                                                                      |                                                                                              |                                                                                                                  |                                                 |
| Molony 2016              | -                                                                    | +                                                              | +                                                        | -                            | high                                                | -                                                                                                                                                                                                       | +                                                                                                                           | high                                                                                                      | -                                                                                                                                                           | +                                                           | +                                                                          | ?                                                                          |                                                                                                                      |                                                                                   |                                                                                           |                                                                                        |                                             |                                                                      |                                                                                              |                                                                                                                  |                                                 |
| Morrell 1971/1972        | -                                                                    | +                                                              | ?                                                        | -                            | high                                                | -                                                                                                                                                                                                       | ?                                                                                                                           | high                                                                                                      | +                                                                                                                                                           | +                                                           | ?                                                                          | ?                                                                          |                                                                                                                      |                                                                                   |                                                                                           |                                                                                        |                                             |                                                                      |                                                                                              |                                                                                                                  |                                                 |
| Movsowitz 1987           | +                                                                    | -                                                              | ?                                                        | -                            | high                                                | +                                                                                                                                                                                                       | +                                                                                                                           | low                                                                                                       | -                                                                                                                                                           | ?                                                           | +                                                                          | ?                                                                          | ?/*                                                                                                                  | ?                                                                                 | -                                                                                         | high                                                                                   |                                             |                                                                      |                                                                                              |                                                                                                                  |                                                 |
| NAMCS Schappert 1999     | -                                                                    | ?                                                              | +                                                        | +                            | low                                                 | -                                                                                                                                                                                                       | +                                                                                                                           | high                                                                                                      | +                                                                                                                                                           | +                                                           | +                                                                          | low                                                                        |                                                                                                                      |                                                                                   |                                                                                           |                                                                                        |                                             |                                                                      |                                                                                              |                                                                                                                  |                                                 |
| Nizami 1997              | -                                                                    | -                                                              | ?                                                        | -                            | high                                                | -                                                                                                                                                                                                       | ?                                                                                                                           | high                                                                                                      | +                                                                                                                                                           | +                                                           | +                                                                          | low                                                                        |                                                                                                                      |                                                                                   |                                                                                           |                                                                                        |                                             |                                                                      |                                                                                              |                                                                                                                  |                                                 |
| Njalsson 1992            | -                                                                    | -                                                              | ?                                                        | +                            | ?                                                   | +                                                                                                                                                                                                       | +                                                                                                                           | low                                                                                                       | -                                                                                                                                                           | +                                                           | +                                                                          | ?                                                                          |                                                                                                                      |                                                                                   |                                                                                           |                                                                                        |                                             |                                                                      |                                                                                              |                                                                                                                  |                                                 |
| SESAM 2 Study Frese 2011 | -                                                                    | +                                                              | +                                                        | +                            | low                                                 | +                                                                                                                                                                                                       | +                                                                                                                           | low                                                                                                       | +                                                                                                                                                           | +                                                           | +                                                                          | low                                                                        |                                                                                                                      |                                                                                   |                                                                                           |                                                                                        |                                             |                                                                      |                                                                                              |                                                                                                                  |                                                 |
| TRANSITION Okkes 2002    | -                                                                    | ?                                                              | +                                                        | +                            | low                                                 | +                                                                                                                                                                                                       | +                                                                                                                           | low                                                                                                       | +                                                                                                                                                           | +                                                           | ?                                                                          | low                                                                        | -                                                                                                                    | ?                                                                                 | -                                                                                         | high                                                                                   |                                             |                                                                      |                                                                                              |                                                                                                                  |                                                 |
| Simoes 1997              | -                                                                    | -                                                              | +                                                        | -                            | ?                                                   | -                                                                                                                                                                                                       | -                                                                                                                           | high                                                                                                      | +                                                                                                                                                           | +                                                           | +                                                                          | low                                                                        |                                                                                                                      |                                                                                   |                                                                                           |                                                                                        |                                             |                                                                      |                                                                                              |                                                                                                                  |                                                 |
| Usherwood 1991           | -                                                                    | ?                                                              | +                                                        | -                            | high                                                | -                                                                                                                                                                                                       | +                                                                                                                           | high                                                                                                      | +                                                                                                                                                           | +                                                           | +                                                                          | low                                                                        |                                                                                                                      |                                                                                   |                                                                                           |                                                                                        |                                             |                                                                      |                                                                                              |                                                                                                                  |                                                 |
| Vinson 1993              | +                                                                    | -                                                              | +                                                        | +                            | low                                                 | +                                                                                                                                                                                                       | +                                                                                                                           | low                                                                                                       | +                                                                                                                                                           | +                                                           | ?                                                                          | low                                                                        | ?/*                                                                                                                  | ?                                                                                 | -                                                                                         | high                                                                                   |                                             |                                                                      |                                                                                              |                                                                                                                  |                                                 |

\*=varying assessments for different aetiological categories
