# Supplementary material for: Coughing children in family practice and primary care: a systematic review of prevalence, aetiology and prognosis
Source: Springer Nature journal article supplement (doi:10.1186/s12887-021-02739-4), 2021-06-04

# Coughing Children in Family Practice and Primary Care: A systematic review of prevalence, aetiology and prognosis

Authors: Milena Bergmann,<sup>a</sup> Jörg Haasenritter,<sup>a</sup> Dominik Beidatsch,<sup>a</sup> Sonja Schwarm,<sup>a</sup> Kaja Hörner,<sup>a</sup> Stefan Bösner,<sup>a</sup> Paula Grevenrath,<sup>a</sup> Laura Schmidt,<sup>a</sup> Annika Viniol,<sup>a</sup> Norbert Donner-Banzhoff<sup>a</sup> and Annette Becker<sup>a\*</sup>

<sup>a</sup> Department of General Practice/Family Medicine, University of Marburg, Marburg, Germany

\* Corresponding author:  
Annette Becker  
Department of General Practice/Family Medicine, University of Marburg  
Karl-von-Frisch-Str. 4, 35043 Marburg, Germany  
E-mail: [Annette.Becker@staff.uni-marburg.de](mailto:Annette.Becker@staff.uni-marburg.de)

Additional File 5:

## **Title:**

Prevalence / incidence of cough of children consulting in primary care (all studies)

## **Legend:**

\* = study included solely children <5/<6/<7 years, § = study included solely children <12/<14/<15 years, ~ = study included solely children 5-17 years, CI = confidence interval, k = number of consultations because of a cough / (incidental) reasons for encounter because of a cough / patients in consultation for a cough, N = total number of consultations / (incidental) reasons for encounter / patients in consultation

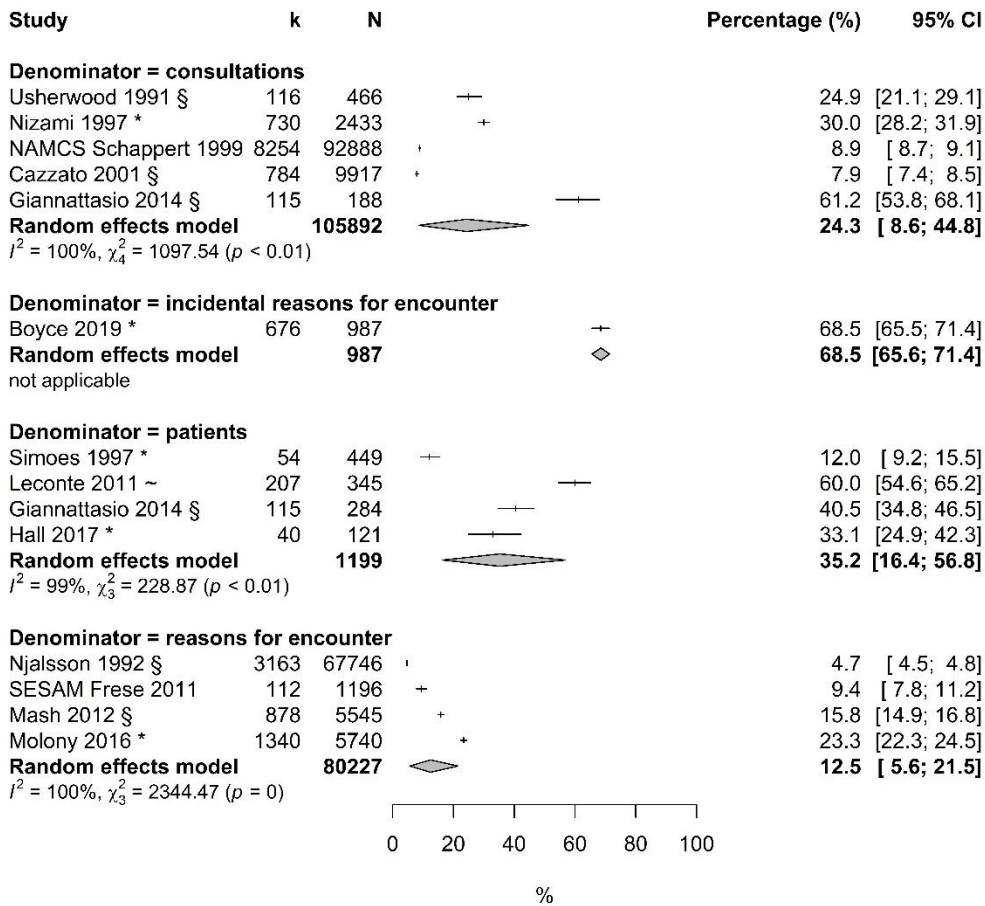

Supplement: MOESM5 [file 19230484]
